# Supplementary material for: Facile room-temperature synthesis of layered transition metal phosphonates via hitherto unknown alkali metal tert-butyl phosphonates
Source: Royal Society of Chemistry journal article supplement (doi:10.1039/d4dt01668h), 2024-01-01
Supplement: d4dt01668h1.pdf [file d4dt01668h1.pdf]

*Supporting Information for*

**Facile room temperature synthesis of layered transition metal phosphonates via hitherto unknown alkali metal tert-butyl phosphonates**

Anuj Kumar, Aheli Ghatak, and Ramaswamy Murugavel\*

Department of Chemistry, Indian Institute of Technology Bombay, Powai, Mumbai 400017,

India, E-mail: [rmv@chem.iitb.ac.in](mailto:rmv@chem.iitb.ac.in)

**Fig. S1** FT-IR spectra of **1-3** as KBr discs.

**Fig. S2**  $^{31}\text{P}$  NMR spectrum of **1-3**

**Fig. S3** CP-MAS  $^7\text{Li}$  NMR spectrum of **1** (233 MHz).

**Fig. S4** CP-MAS  $^{13}\text{C}$  NMR spectrum of **1** (150 MHz).

**Fig. S5** The CP-MAS  $^{13}\text{C}$  NMR spectrum of **2** (100 MHz).

**Fig. S6** The CP-MAS  $^{13}\text{C}$  NMR spectrum of **3** (125 MHz).

**Table S1** Shape analysis in complex **1**.

**Table S2** Shape analysis in complex **2**.

**Table S3** Shape analysis in complex **3**.

**Table S4** Selected bond distances ( $\text{\AA}$ ) and bond angles ( $^\circ$ ) in **1**.

**Table S5** Hydrogen bonds ( $\text{\AA}$ ) and angles ( $^\circ$ ) for **1**.

**Table S6** Selected bond distances ( $\text{\AA}$ ) and bond angles ( $^\circ$ ) in **2**.

**Table S7** Hydrogen bonds ( $\text{\AA}$ ) and angles ( $^\circ$ ) for **2**.

**Table S8** Selected bond distances ( $\text{\AA}$ ) and bond angles ( $^\circ$ ) in **3**.

**Table S9** Hydrogen bonds ( $\text{\AA}$ ) and angles ( $^\circ$ ) for **3**.

**Fig. S7** TGA profile of compounds **1**

**Fig. S8** TGA profile of compounds **2**

**Fig. S9** TGA profile of compounds **3**

**Fig. S10** SEM images of compound **1** with elemental mapping

**Fig. S11** SEM images of compound **2** with elemental mapping

**Fig. S12** SEM images of compound **3** with elemental mapping

**Fig. S13** PXRD pattern of **1**

**Fig. S14** PXRD pattern of **2**

**Fig. S15** PXRD pattern of **3**

**Fig. S16** Comparison of FT-IR spectra of **4-6** with **2** as KBr diluted discs.

**Fig. S17** PXRD pattern of **6**

**Fig. S18** SEM images of compound **4** with elemental mapping

**Fig. S19** SEM images of compound **6** with elemental mapping

**Fig. S20** DR-UV of compound **4**

**Fig. S21** DR-UV of compound **5**

**Fig. S22** DR-UV of compound **6**

**Fig. S23** TGA profile of compounds **4**

**Fig. S24** TGA profile of compounds **5**

**Fig. S25** TGA profile of compounds **6**

**Fig. S26** CP-MAS  $^{31}\text{P}$  NMR spectrum of **4** (162 MHz)

**Fig. S27** Elemental analysis of **1**

**Fig. S28** Elemental analysis of **2**

**Fig. S29** Elemental analysis of **3**

**Fig. S30** Elemental analysis of **4**

**Fig. S31** Elemental analysis of **5**

**Fig. S32** Elemental analysis of **6**

**Table S10.** Chemical composition of **1-3** measured with ICP-AES

**Table S11.** Chemical composition of **4-6** measured with ICP-AES

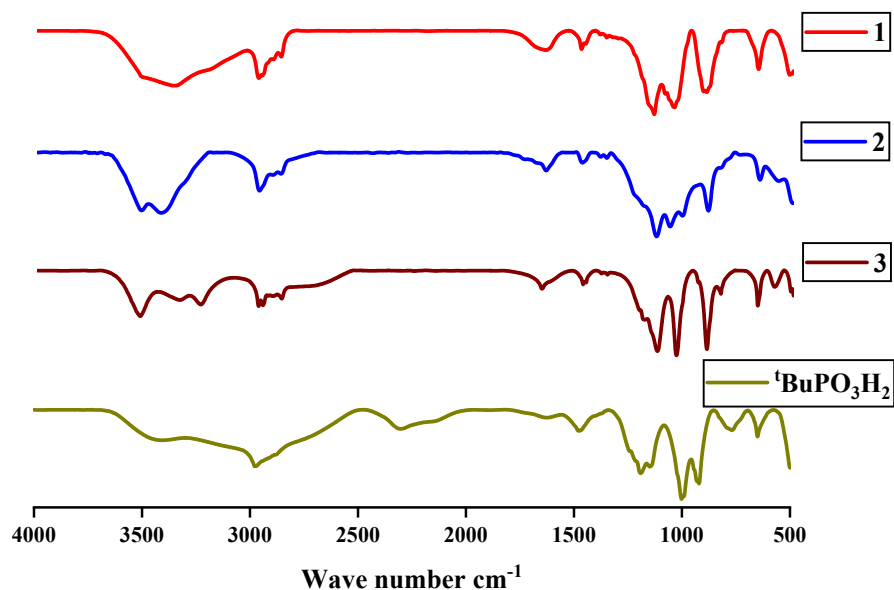

**Fig. S1** FT-IR spectra of **1-3** (as KBr Discs).

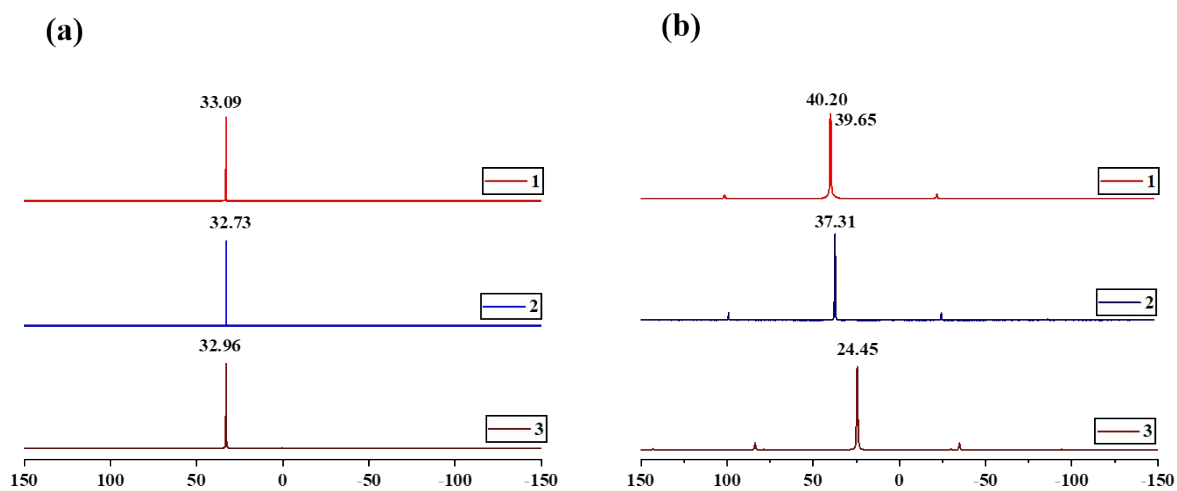

**Fig. S2** (a)  $^{31}\text{P}$  NMR spectrum of **1-3** (in  $\text{D}_2\text{O}$ , 202 MHz Left), (b) CP-MAS  $^{31}\text{P}$  NMR spectrum of **1** and **2** (162 MHz), and **3** (202 MHz) ( $\delta$  in ppm).

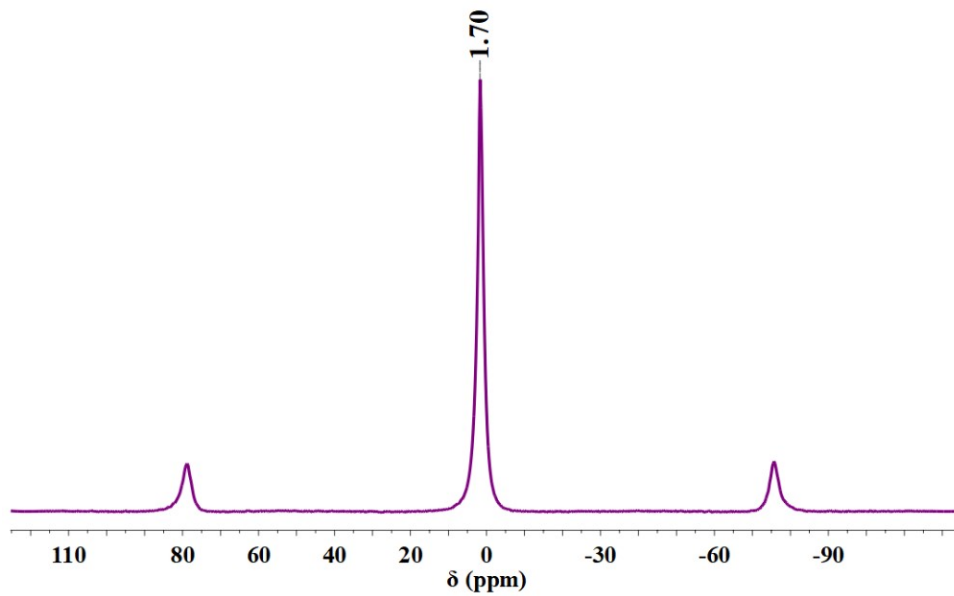

**Fig. S3** CP-MAS  $^7\text{Li}$  NMR spectrum of  $[(^t\text{BuPO}_3\text{H})\text{Li}(\text{H}_2\text{O})_3 \cdot (\text{H}_2\text{O})]$  **1** (233 MHz).

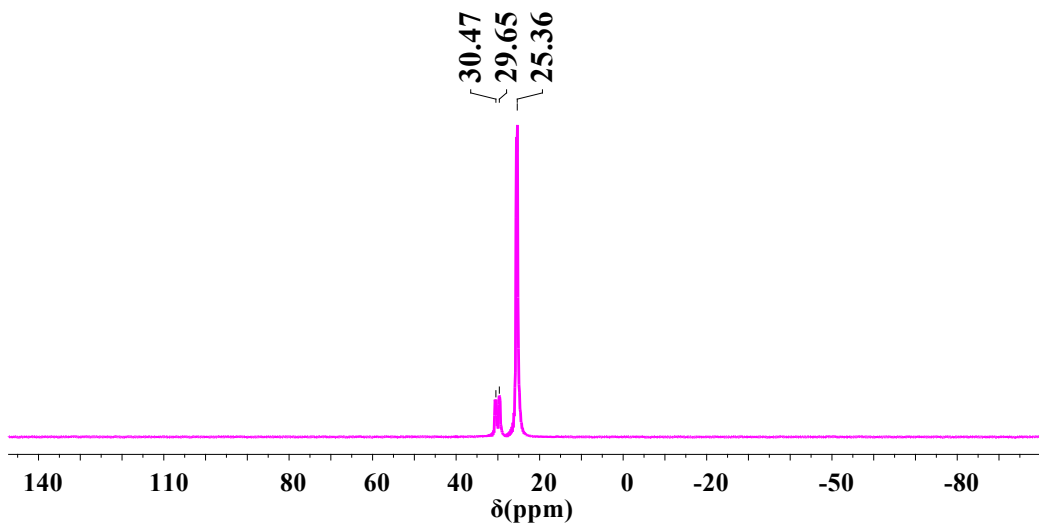

**Fig. S4** The CP-MAS  $^{13}\text{C}$  NMR spectrum of  $[(^t\text{BuPO}_3\text{H})\text{Li}(\text{H}_2\text{O})_3 \cdot (\text{H}_2\text{O})]$  **1** (150 MHz).

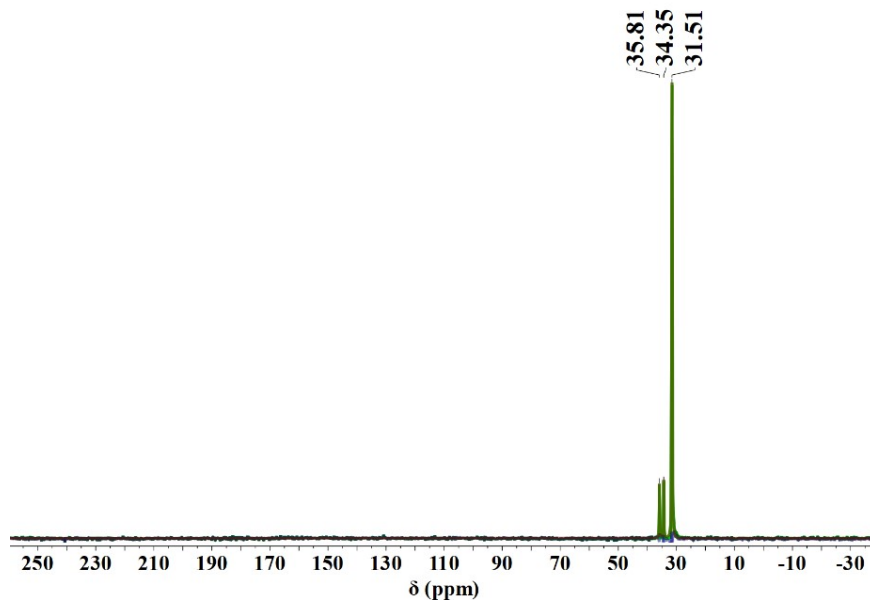

**Fig. S5** The CP-MAS  $^{13}\text{C}$  NMR spectrum of  $[(^t\text{BuPO}_3)\text{Na}_2(\text{H}_2\text{O})_4]_n$  **2** (100 MHz).

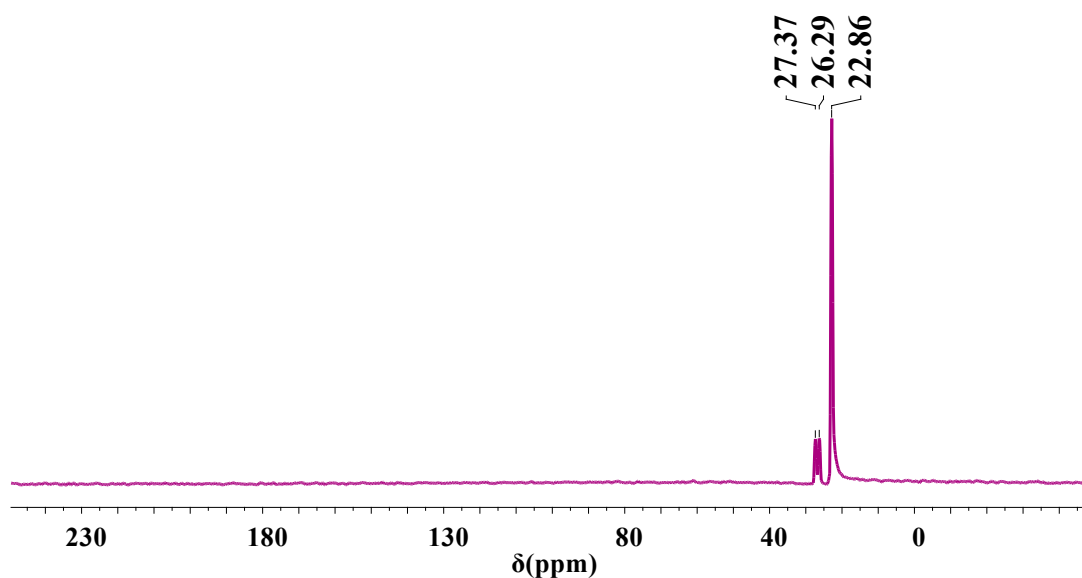

**Fig. S6** The CP-MAS  $^{13}\text{C}$  NMR spectrum of  $[(^t\text{BuPO}_3\text{H})\text{K}(\text{H}_2\text{O})]_n$  **3** (125 MHz).

### SHAPE analysis of alkali metals centers in 1-3

The coordination environment of the tetra-coordinated Li-ion in complex **1** adopts a tetrahedral shape, while the  $\text{Na}_1(\text{I})$  exhibits an octahedron environment, and  $\text{Na}_2(\text{I})$  displays a vacant trigonal bipyramid. The geometry of the  $\text{K}(\text{I})$  in compound **3** takes on a capped trigonal prism configuration. These geometries were analyzed by SHAPE 2.1 software. Continuous Shape measurements reveal that the core geometries of the alkali metal center in all three complexes (**1-**

3) differ, with minimal deviation from ideal *Td* symmetry in compound **1**, *Oh* and *C<sub>3v</sub>* symmetry in compound **2**, and similarly *C<sub>2v</sub>* symmetry in compound **3**.

**Table S1** Shape analysis in complex **1** (Li atom)

| Structure | SP-4                  | T-4                | SS-4                  | vTBPY-4                   |
|-----------|-----------------------|--------------------|-----------------------|---------------------------|
| Shape     | Square                | <b>Tetrahedron</b> | Seesaw                | Vacant trigonal bipyramid |
| Symmetry  | <i>D<sub>4h</sub></i> | <b><i>Td</i></b>   | <i>C<sub>2v</sub></i> | <i>C<sub>3v</sub></i>     |
| Deviation | 32.344                | <b>0.126</b>       | 8.413                 | 2.708                     |

**Table S2** Shape analysis in complex **2** (Na<sub>1</sub> atom)

| Structure | HP-6                  | PPY-6                 | OC-6              | TPR-6                 | JPPY-6                        |
|-----------|-----------------------|-----------------------|-------------------|-----------------------|-------------------------------|
| Shape     | Hexagon               | Pentagonal pyramid    | <b>Octahedron</b> | Trigonal prism        | Johnson pentagonal pyramid J2 |
| Symmetry  | <i>D<sub>6h</sub></i> | <i>C<sub>5v</sub></i> | <b><i>Oh</i></b>  | <i>D<sub>3h</sub></i> | <i>C<sub>5v</sub></i>         |
| Deviation | 30.058                | 27.009                | <b>0.476</b>      | 14.939                | 29.924                        |

Shape analysis in complex **2** (Na<sub>2</sub> atom)

| Structure | SP-4                  | T-4         | SS-4                  | vTBPY-4                          |
|-----------|-----------------------|-------------|-----------------------|----------------------------------|
| Shape     | Square                | Tetrahedron | Seesaw                | <b>Vacant trigonal bipyramid</b> |
| Symmetry  | <i>D<sub>4h</sub></i> | <i>Td</i>   | <i>C<sub>2v</sub></i> | <b><i>C<sub>3v</sub></i></b>     |
| Deviation | 25.365                | 3.982       | 3.788                 | <b>1.660</b>                     |

**Table S3** Shape analysis in complex **3** (K atom)

| Structure | HP-7     | HPY-7             | PBPY-7               | COC-7             | CTPR-7                       | JPBPY-7                          | JETPY-7                                 |
|-----------|----------|-------------------|----------------------|-------------------|------------------------------|----------------------------------|-----------------------------------------|
| Shape     | Heptagon | Hexagonal pyramid | Pentagonal bipyramid | Capped octahedron | <b>Capped trigonal prism</b> | Johnson pentagonal bipyramid J13 | Johnson elongated triangular pyramid J7 |
| Symmetry  | $D_{7h}$ | $C_{6v}$          | $D_{5h}$             | $C_{3v}$          | $C_{2v}$                     | $D_{5h}$                         | $C_{3v}$                                |
| Deviation | 33.211   | 19.510            | 8.228                | 4.176             | <b>3.491</b>                 | 10.491                           | 18.536                                  |

**Table S4** Selected bond distances (Å) and bond angles (°) in **1**.

|            |          |                 |          |
|------------|----------|-----------------|----------|
| Li(1)–O(1) | 1.906(5) | O(1)–Li(1)–O(4) | 115.6(3) |
| Li(1)–O(4) | 1.938(5) | O(1)–Li(1)–O(5) | 109.7(2) |
| Li(1)–O(5) | 1.975(5) | O(1)–Li(1)–O(6) | 111.9(2) |
| Li(1)–O(6) | 1.959(5) | O(4)–Li(1)–O(5) | 103.9(2) |
| P(1)–O(1)  | 1.503(2) | O(4)–Li(1)–O(6) | 109.3(2) |
| P(1)–O(2)  | 1.508(2) | O(6)–Li(1)–O(5) | 105.7(2) |
| P(1)–O(3)  | 1.591(2) |                 |          |

**Table S5** Hydrogen bonds table for **1** [Å and °].

| D–H...A                          | d(D–H) [Å] | d(D–H) [Å] | d(D–A) [Å] | ∠D–H–A [°] |
|----------------------------------|------------|------------|------------|------------|
| O(3)–H(3)...O(7)                 | 0.84       | 1.80       | 2.585(3)   | 153.9      |
| O(4)–H(4A)...O(5) <sup>#1</sup>  | 0.85       | 2.03       | 2.862(3)   | 165.1      |
| O(5)–H(5A)...O(6) <sup>#2</sup>  | 0.85       | 1.91       | 2.768(3)   | 175.9      |
| O(5)–H(5B)... O(7)               | 0.80(4)    | 2.03(4)    | 2.797(3)   | 161(3)     |
| O(6)–H(6A)... O(2) <sup>#3</sup> | 0.85       | 1.85       | 2.680(3)   | 163.5      |
| O(6)–H(6B)... O(3) <sup>#4</sup> | 0.85       | 2.01       | 2.802(3)   | 154.1      |
| O(7)–H(7A)... O(1) <sup>#5</sup> | 0.85       | 1.89       | 2.730(3)   | 170.4      |
| O(7)–H(7B)... O(2) <sup>#3</sup> | 0.82(5)    | 1.88(5)    | 2.665(3)   | 161(4)     |

Symmetry transformations used to generate equivalent atoms: <sup>#1</sup>1–X,1–Y,1–Z; <sup>#2</sup>1–X,2–Y,1–Z; <sup>#3</sup>+X,1+Y,+Z; <sup>#4</sup>-1+X,1+Y,+Z; <sup>#5</sup>1+X,+Y,+Z.

**Table S6** Selected bond distances (Å) and bond angles (°) in **2**.

|                                |          |                                              |           |
|--------------------------------|----------|----------------------------------------------|-----------|
| Na(1)–O(4) <sup>#1</sup>       | 2.374(4) | O(4) <sup>#2</sup> –Na(1)–O(7)               | 94.3(1)   |
| Na(1)–O(4)                     | 2.323(4) | O(4) <sup>1</sup> –Na(1)–O(7)                | 83.9(1)   |
| Na(1)–O(5)                     | 2.523(4) | O(5)–Na(1)–O(7)                              | 175.3(1)  |
| Na(1)–O(6) <sup>#2</sup>       | 2.325(4) | O(6)–Na(1)–O(4)                              | 99.0(1)   |
| Na(1)–O(6)                     | 2.301(4) | O(6)–Na(1)–O(4) <sup>#2</sup>                | 84.6(1)   |
| Na(1)–O(7)                     | 2.558(4) | O(6) <sup>#1</sup> –Na(1)–O(4) <sup>#2</sup> | 91.1(1)   |
| Na(2)–O(1)                     | 2.807(5) | O(6) <sup>#1</sup> –Na(1)–O(5)               | 89.5(1)   |
| Na(2)–O(3) <sup>#4</sup>       | 2.676(5) | O(6)–Na(1)–O(5)                              | 92.8(1)   |
| Na(2)–O(4)                     | 2.794(5) | O(6)–Na(1)–O(6) <sup>#1</sup>                | 175.1(1)  |
| Na(2)–O(6) <sup>#3</sup>       | 2.713(5) | O(6) <sup>#1</sup> –Na(1)–O(7)               | 87.3(3)   |
| P(1)–O(1)                      | 1.596(3) | O(6)–Na(1)–O(7)                              | 90.8(1)   |
| P(1)–O(2)                      | 1.502(4) | O(3) <sup>#4</sup> –Na(2)–O(1)               | 107.0(2)  |
| P(1)–O(3)                      | 1.514(3) | O(3) <sup>#4</sup> –Na(2)–O(4)               | 99.8(2)   |
| O(4)–Na(1)–O(4) <sup>#2</sup>  | 176.0(1) | O(3) <sup>#4</sup> –Na(2)–O(6) <sup>#3</sup> | 115.9(2)  |
| O(4) <sup>#2</sup> –Na(1)–O(5) | 89.1(1)  | O(4)–Na(2)–O(1)                              | 95.8(2)   |
| O(4)–Na(1)–O(5)                | 92.5(1)  | O(6) <sup>#3</sup> –Na(2)–O(1)               | 137.4(22) |
| O(4)–Na(1)–O(6) <sup>#1</sup>  | 85.2(1)  | O(6) <sup>#3</sup> –Na(2)–O(4)               | 83.1(1)   |

Symmetry transformations used to generate equivalent atoms: <sup>#1</sup>1-X,-1/2+Y,1/2-Z; <sup>#2</sup>1-X,1/2+Y,1/2-Z; <sup>#3</sup>1-X,1-Y,1-Z; <sup>#4</sup>+X,-1+Y,+Z; <sup>#5</sup>+X,1+Y,+Z.

**Table S7:** Hydrogen bonds (Å) and angles (°) for **2**.

| D–H···A                         | d(D–H)  | d(H···A) | d(D···A) | <(DHA) |
|---------------------------------|---------|----------|----------|--------|
| O(5)–H(5A)···O(7) <sup>#1</sup> | 0.89(2) | 1.98(3)  | 2.856(5) | 166(6) |
| O(5)–H(5B)···O(2) <sup>#2</sup> | 0.68(7) | 2.16(7)  | 2.837(5) | 171(8) |

Symmetry transformations used to generate equivalent atoms: <sup>#1</sup>1-X,-1/2+Y,1/2-Z; <sup>#2</sup>+X,3/2-Y,-1/2+Z.

**Table S8** Selected bond distances (Å) and bond angles (°) in **3**.

|                         |          |                                             |          |
|-------------------------|----------|---------------------------------------------|----------|
| K(1)–O(1) <sup>#1</sup> | 2.835(4) | O(1) <sup>#1</sup> –K(1)–O(4) <sup>#4</sup> | 89.0(1)  |
| K(1)–O(1)               | 2.712(4) | O(1) <sup>#1</sup> –K(1)–O(4) <sup>#5</sup> | 155.7(1) |
| K(1)–O(3) <sup>#3</sup> | 2.742(4) | O(1)–K(1)–O(4)                              | 53.0(1)  |
| K(1)–O(3) <sup>#1</sup> | 2.944(4) | O(1)–K(1)–O(4) <sup>#5</sup>                | 74.9(1)  |
| K(1)–O(4) <sup>#4</sup> | 2.836(4) | O(3) <sup>#3</sup> –K(1)–O(1) <sup>#1</sup> | 118.7(1) |
| K(1)–O(4)               | 3.306(4) | O(3) <sup>#3</sup> –K(1)–O(3) <sup>#1</sup> | 77.8(8)  |
| K(1)–O(4) <sup>#5</sup> | 2.857(4) | O(3) <sup>#3</sup> –K(1)–O(4) <sup>#5</sup> | 85.4(1)  |
| P(1)–O(1)               | 1.503(4) | O(3) <sup>#1</sup> –K(1)–O(4)               | 74.6(1)  |



|                                             |          |                                             |          |
|---------------------------------------------|----------|---------------------------------------------|----------|
| P(1)–O(2)                                   | 1.577(4) | O(3) <sup>#3</sup> –K(1)–O(4)               | 96.5(1)  |
| P(1)–O(3)                                   | 1.508(4) | O(3) <sup>#3</sup> –K(1)–O(4) <sup>#4</sup> | 99.5(1)  |
| O(1)–K(1)–O(1) <sup>#1</sup>                | 84.7(1)  | O(4) <sup>#4</sup> –K(1)–O(3) <sup>#1</sup> | 127.8(1) |
| O(1)–K(1)–O(3) <sup>#3</sup>                | 146.1(1) | O(4) <sup>#5</sup> –K(1)–O(3) <sup>#1</sup> | 145.8(1) |
| O(1) <sup>#1</sup> –K(1)–O(3) <sup>#1</sup> | 51.8(1)  | O(4) <sup>#5</sup> –K(1)–O(4)               | 78.0(9)  |
| O(1)–K(1)–O(3) <sup>#1</sup>                | 103.5(1) | O(4) <sup>#4</sup> –K(1)–O(4) <sup>#5</sup> | 83.9(1)  |
| O(1) <sup>#1</sup> –K(1)–O(4)               | 100.3(1) | O(4) <sup>#4</sup> –K(1)–O(4)               | 154.8(7) |
| O(1)–K(1)–O(4) <sup>#4</sup>                | 105.5(1) |                                             |          |

Symmetry transformations used to generate equivalent atoms: <sup>#1</sup>1-X,1-Y,1-Z; <sup>#2</sup>1-X,1-Y,2-Z; <sup>#3</sup>1-X,1/2+Y,3/2-Z; <sup>#4</sup>1-X,-1/2+Y,3/2-Z; <sup>#5</sup>+X,3/2-Y,1/2+Z.

**Table S9** Hydrogen bonds (Å) and angles (°) for **3**.

| D–H···A                        | d(D–H) | d(H···A) | d(D···A) | <(DHA) |
|--------------------------------|--------|----------|----------|--------|
| O(2)–H(2)···O(3) <sup>#1</sup> | 0.84   | 1.77     | 2.568(5) | 157.9  |

Symmetry transformations used to generate equivalent atoms: <sup>#1</sup>+X,1/2-Y,1/2+Z.

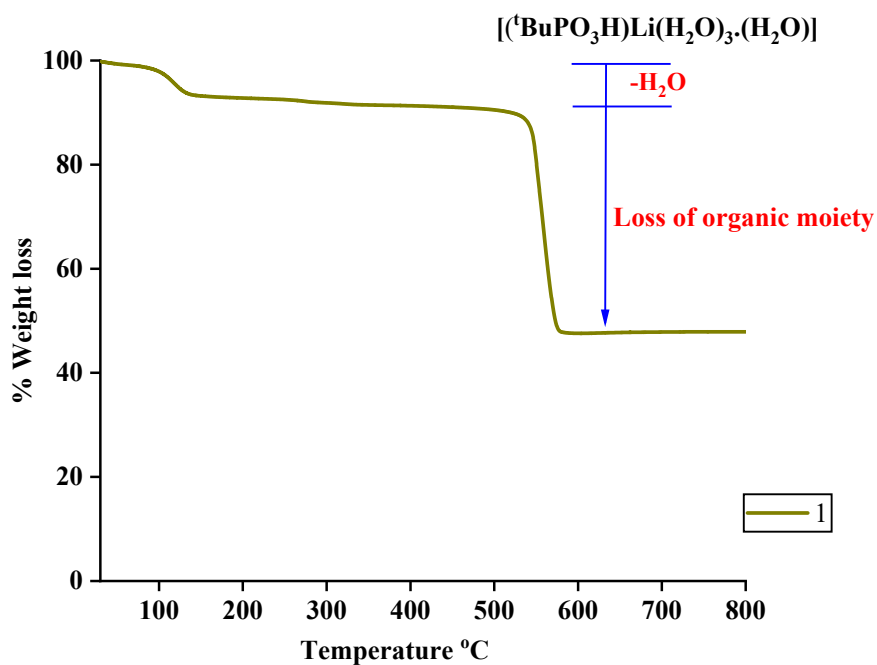

**Fig. S7** TGA profile of **1** recorded under a flow of N<sub>2</sub> at a heating rate of 10 °C min<sup>-1</sup>.

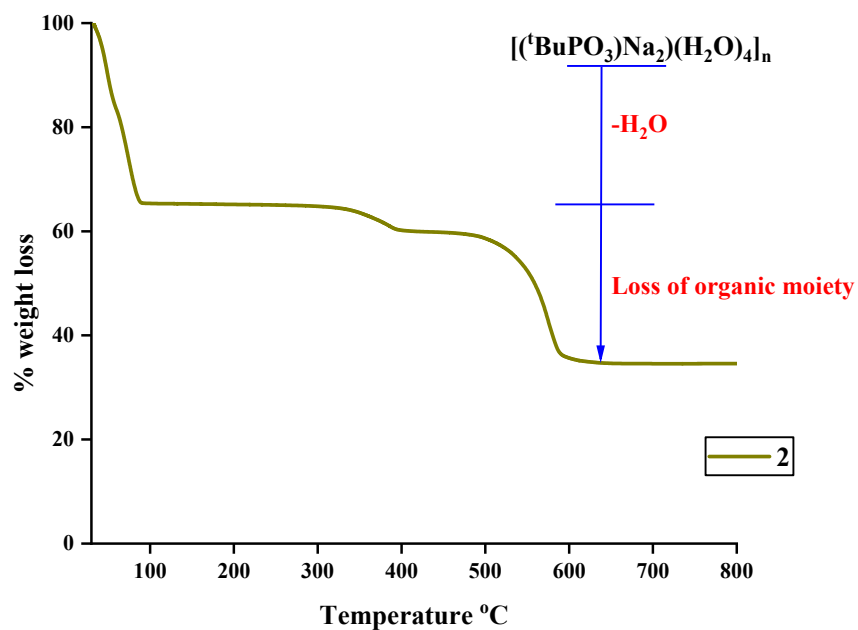

**Fig. S8** TGA profile of **2** recorded under a flow of  $\text{N}_2$  at a heating rate of  $10\text{ }^\circ\text{C min}^{-1}$ .

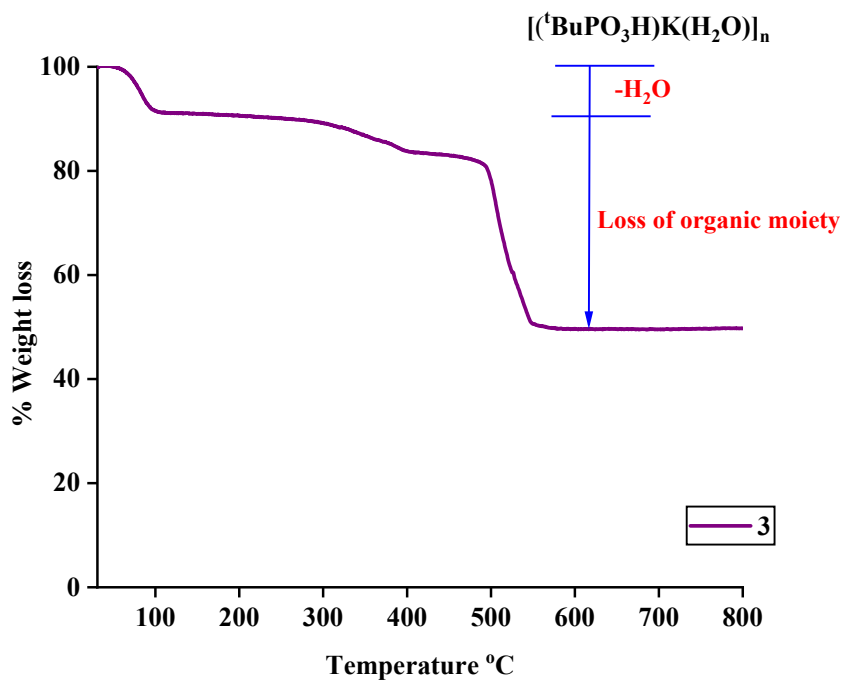

**Fig. S9** TGA profile of **3** recorded under a flow of  $\text{N}_2$  at a heating rate of  $10\text{ }^\circ\text{C min}^{-1}$ .

### SEM morphological studies of alkali metals tert-butyl phosphonates 1-3

The morphological features of alkali metal tert-butyl phosphonate compounds **1**, **2**, and **3** were investigated by a field emission scanning electron microscope (FEG\_SEM). The FEG-SEM images revealed a layered sheet kind of morphology of compounds **1**, **2**, in (Fig. S10 and S11) and **3** was shown (Fig. S12), which has been further corroborated by the single-crystal X-ray diffraction experiments (vide supra). Comparing the surface roughness of compounds **2** and **3** exhibited a higher degree of roughness compared to compound **1**. The average size of the synthesized sheet-like structures ranged from a few micro to 15  $\mu\text{m}$ . Notably, the compound **3** exhibited a unique feature where the single sheet rolled up to form a tubular structure reminiscent of carbon nanotubes (Fig. S13) Furthermore, SEM-EDX mapping confirmed the uniform distribution of the respective elements throughout the layered sheet structure of compounds **1**, **2**, and **3**, indicating the consistent composition and structure of these materials.

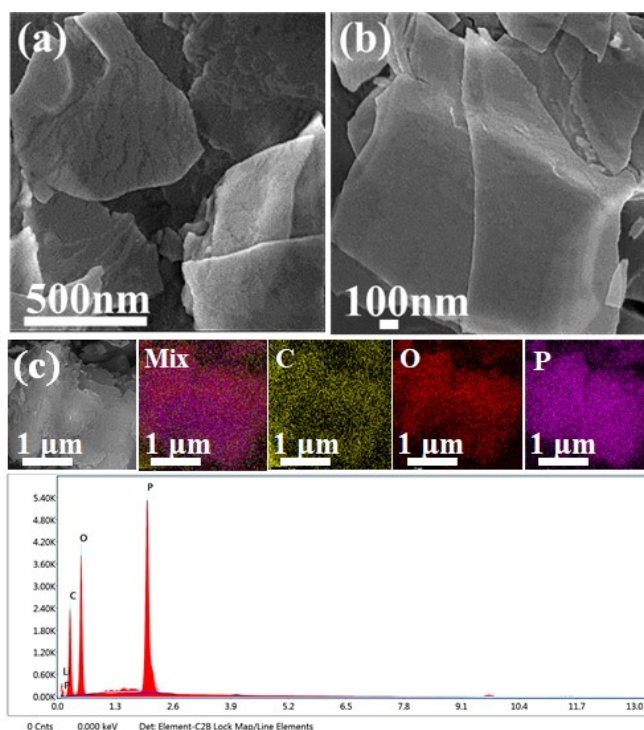

**Fig. S10** SEM images of compound **1**, (a) and (b) showing layered structures; (c) EDX spectrum of **1** with elemental mapping.

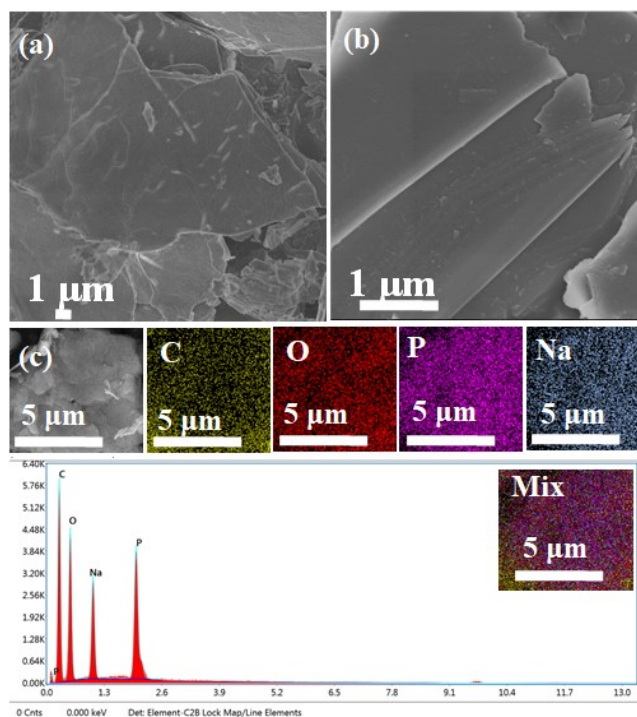

**Fig. S11** SEM images of compound **2** (a) and (b) showing layered structures; (c) EDX spectrum of **2** with elemental mapping.

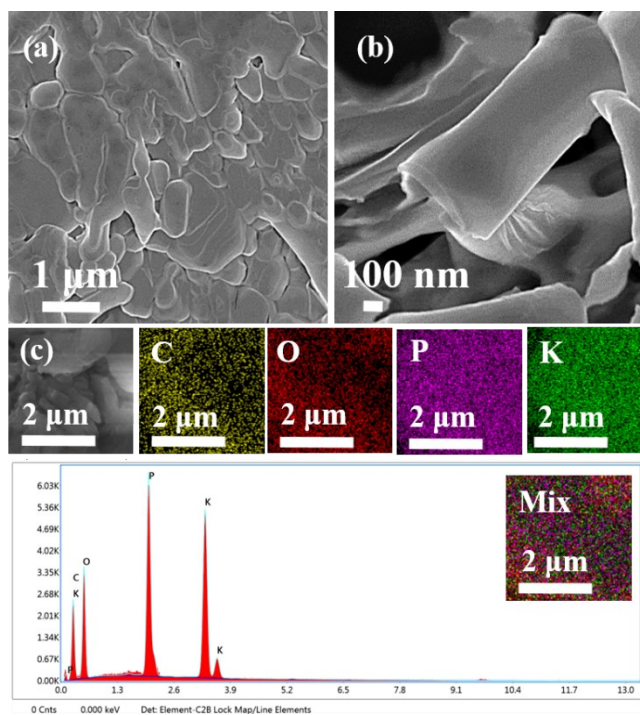

**Fig. S12** SEM images of compound **3**; (a) and (b) showing layered structures; (c) EDX spectrum of **3** with elemental mapping.

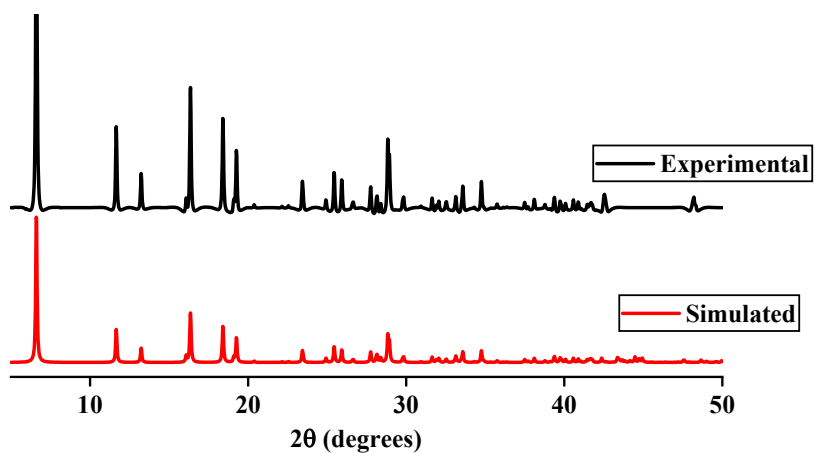

Fig. S13 PXRd pattern of 1

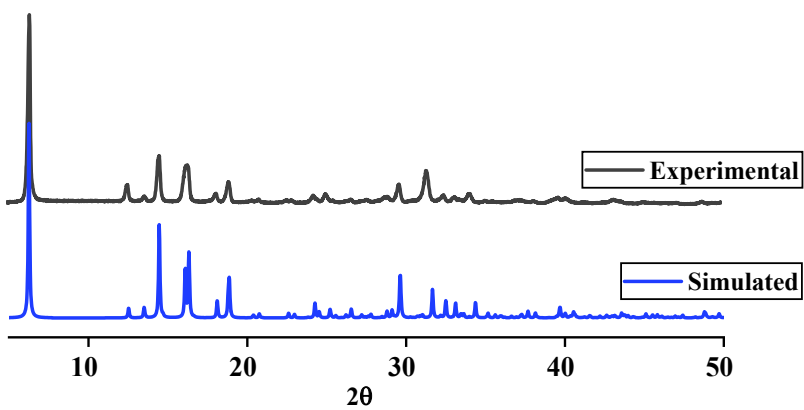

Fig. S14 PXRd pattern of 2

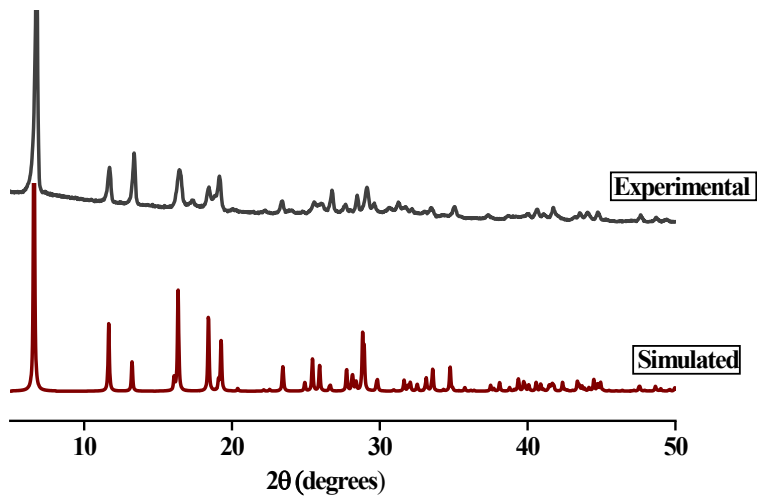

Fig. S15 PXRd pattern of 3

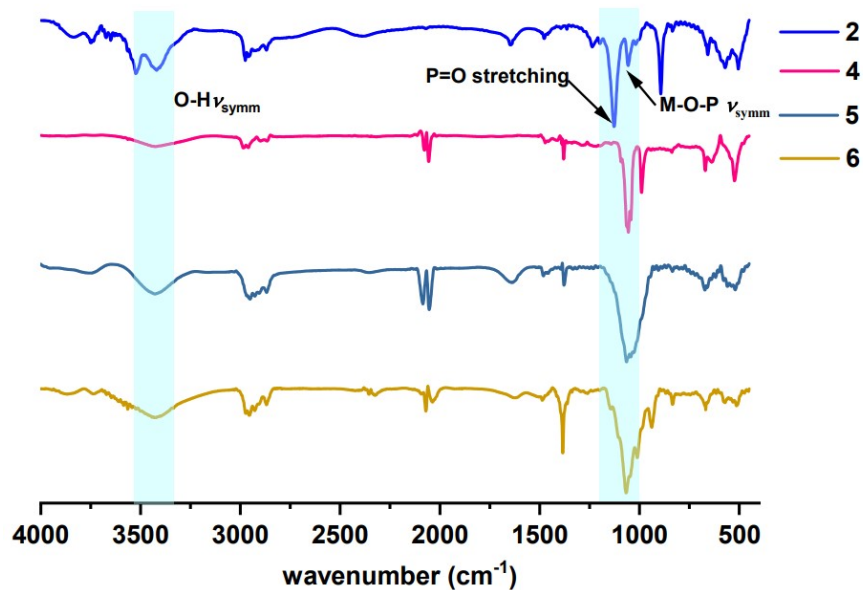

**Fig. S16** Comparison of FT-IR spectra of 4-6 with 2 (as KBr diluted disc).

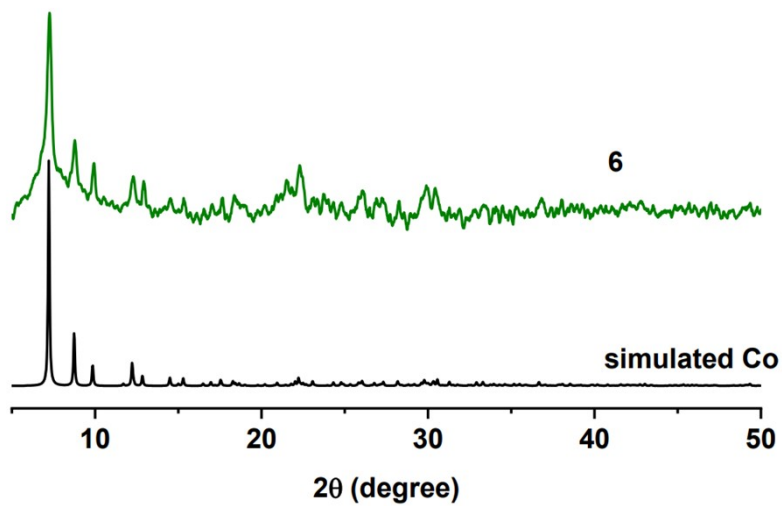

**Fig. S17** PXRD pattern of  $[(\text{tBuPO}_3)\text{Co}(\text{H}_2\text{O})]_n$  6.

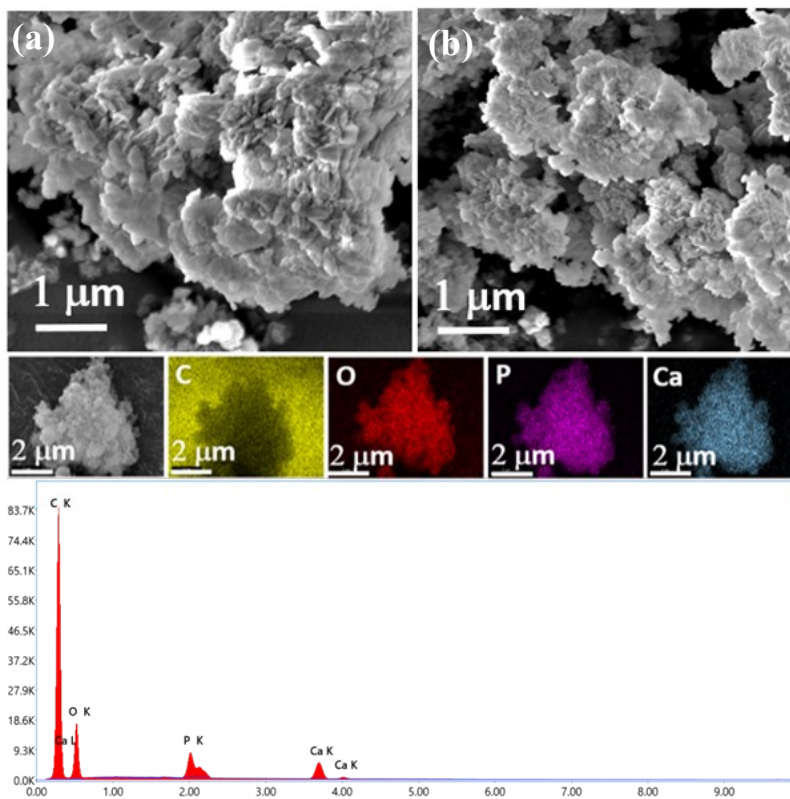

**Fig. S18** SEM images of compound 4; (a) and (b) showing layered structures; (c) EDX spectrum of 6 with elemental mapping. (compound was SEM beam sensitive)

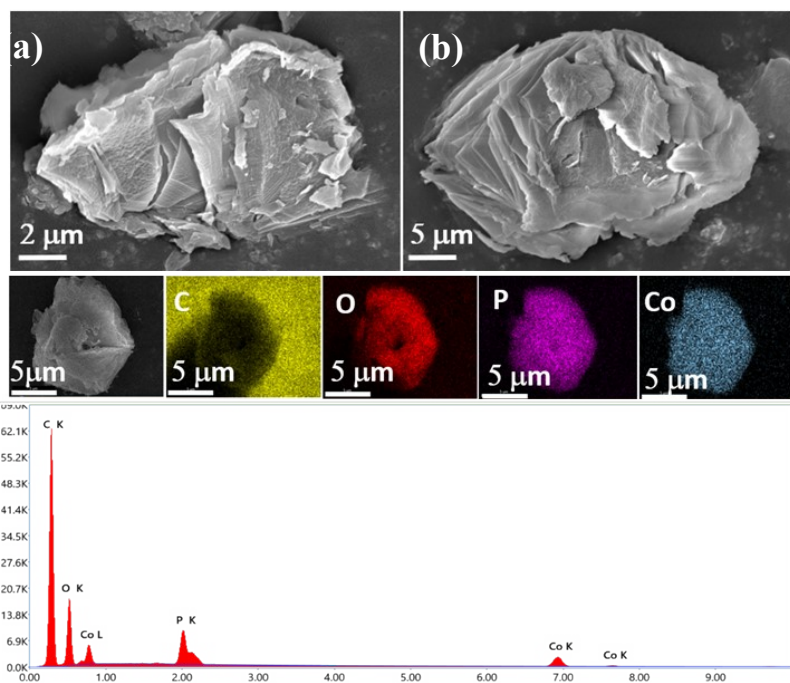

**Fig. S19** SEM images of compound 6; (a) and (b) showing layered structures; (c) EDX spectrum of 6 with elemental mapping.

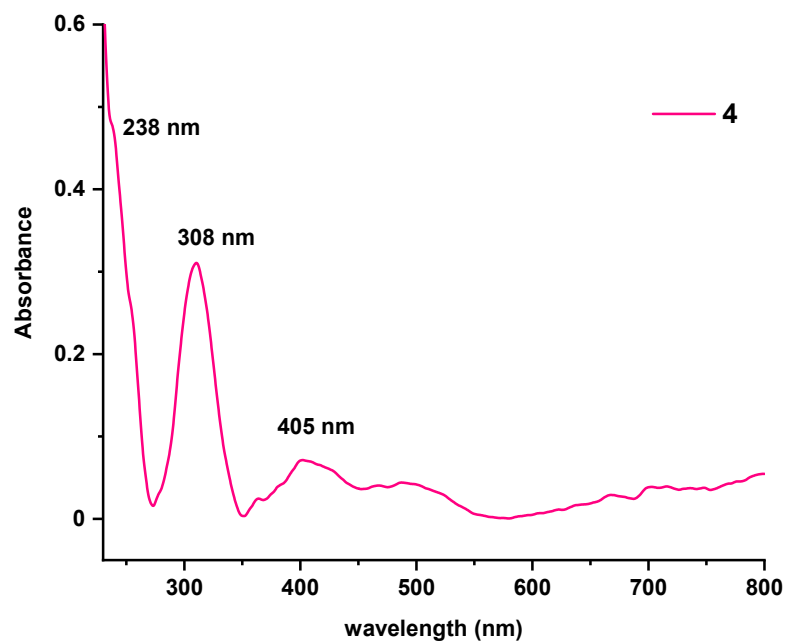

Fig. S20 DR-UV of  $[(\text{BuPO}_3)\text{Ca}(\text{H}_2\text{O})]_n$  (**4**).

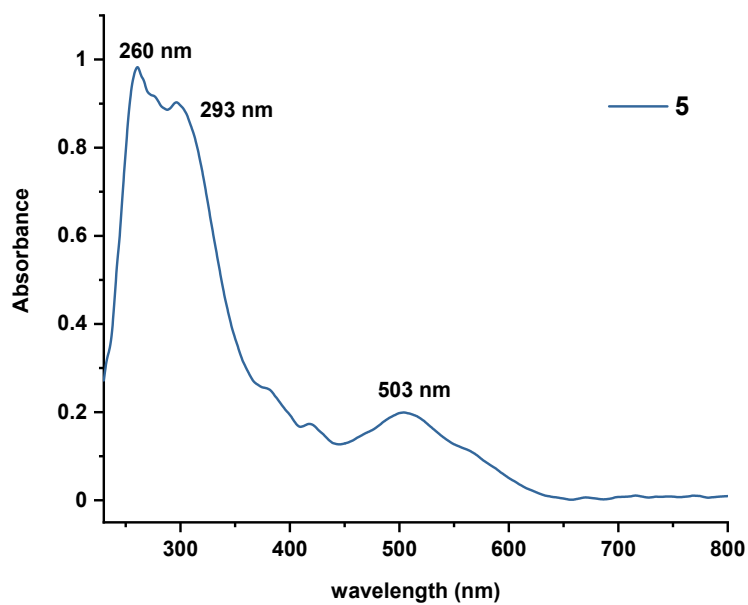

Fig. S21 DR-UV of  $[(\text{BuPO}_3)\text{Mn}(\text{H}_2\text{O})]_n$  (**5**).



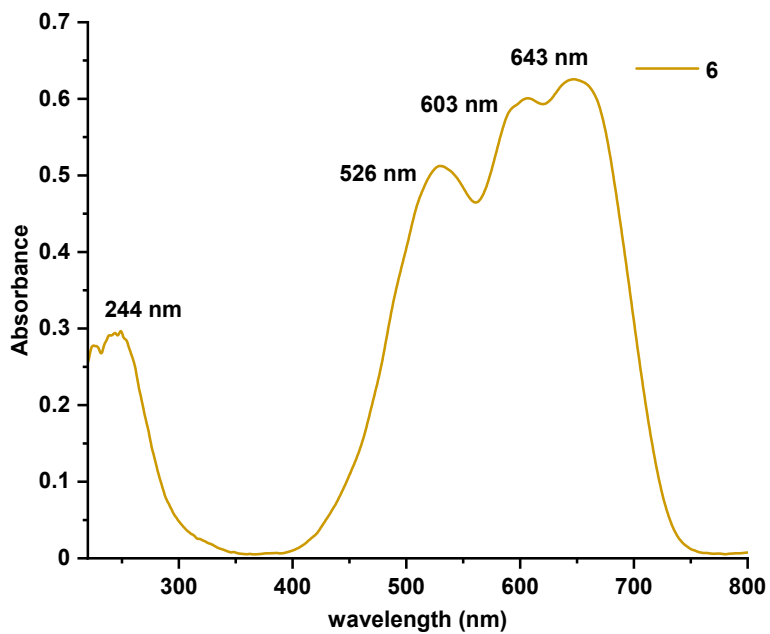

Fig. S22 DR-UV of  $[(^t\text{BuPO}_3)\text{Co}(\text{H}_2\text{O})]_n$  (**6**).

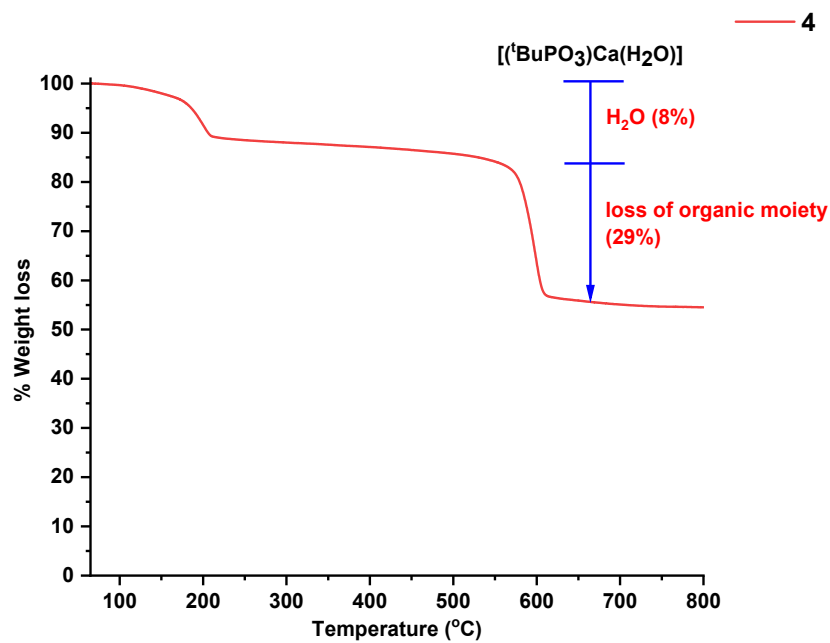

Fig. S23 TGA profile of compound **4** recorded under a flow of  $\text{N}_2$  at a heating rate of  $10\text{ }^\circ\text{C min}^{-1}$ .

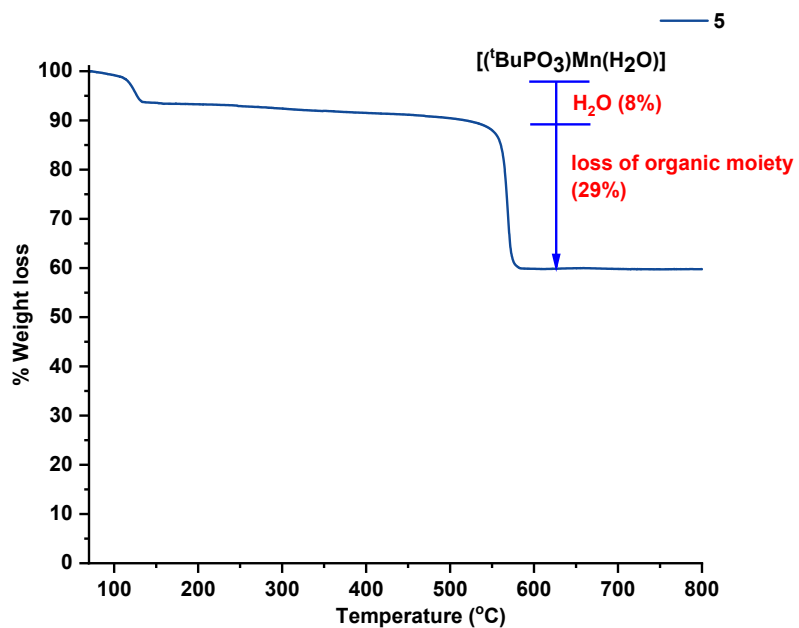

**Fig. S24** TGA profile of compound **5** recorded under a flow of  $\text{N}_2$  at a heating rate of  $10\text{ }^{\circ}\text{C min}^{-1}$ .

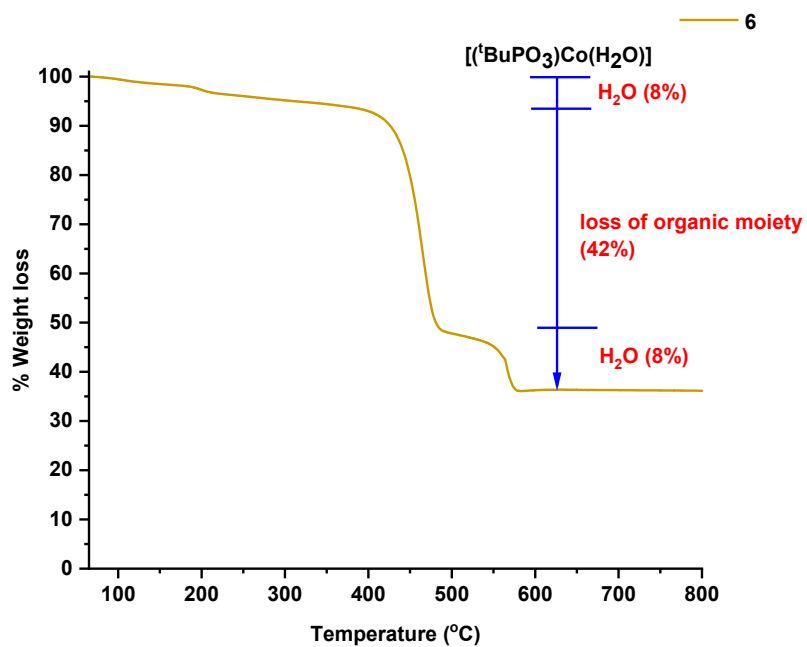

**Fig. S25** TGA profile of compound **6** recorded under a flow of  $\text{N}_2$  at a heating rate of  $10\text{ }^{\circ}\text{C min}^{-1}$ .

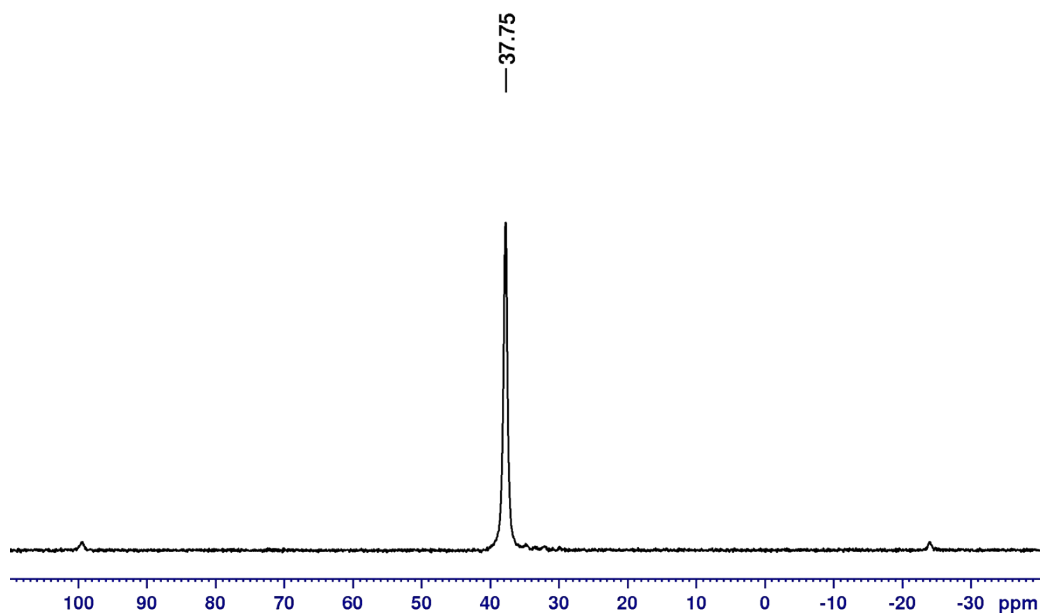

**Fig. S26** CP-MAS  $^{31}\text{P}$  NMR spectrum of  $[(t\text{-BuPO}_3)\text{Ca}(\text{H}_2\text{O})]_n$  **4** (162 MHz).

| No. | Weight [mg] | Name        | Method     | C [%] | H [%] | Date       | Time  |
|-----|-------------|-------------|------------|-------|-------|------------|-------|
| 21  | 1.6390      | RM-AK-251-R | 2mgChem80s | 23.89 | 7.344 | 18-01-2024 | 15:35 |

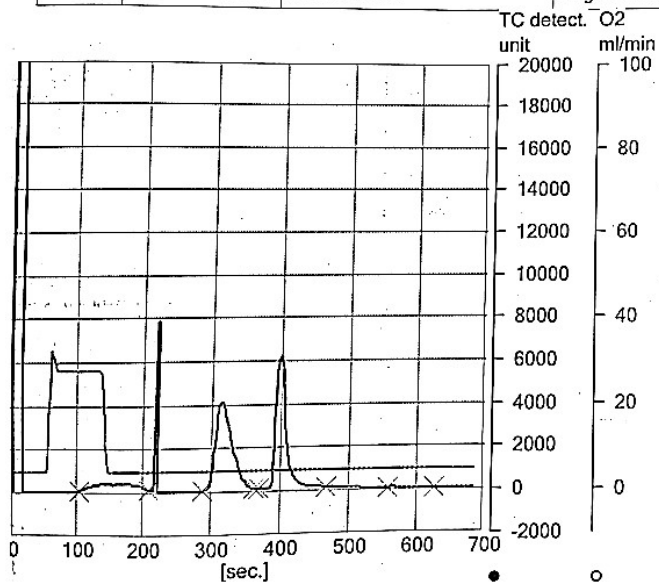

**Fig. S27** Elemental analysis of  $[(t\text{-BuPO}_3)\text{HLi}(\text{H}_2\text{O})_3 \cdot (\text{H}_2\text{O})]$  **(1)**.

| No. | Weight [mg] | Name       | Method     | C [%] | H [%] | Date       | Time  |
|-----|-------------|------------|------------|-------|-------|------------|-------|
| 24  | 1.1160      | RM-AK407-A | 2mgChem80s | 20.18 | 7.414 | 18-01-2024 | 16:11 |

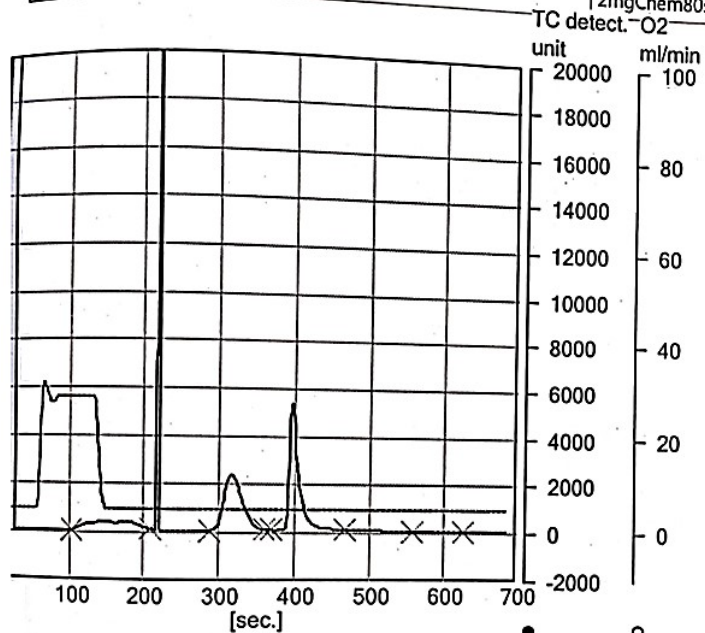

Fig. S28 Elemental analysis of  $[(^t\text{BuPO}_3\text{Na}_2)(\text{H}_2\text{O})_4]_n$  (2).

| No. | Weight ... | Name      | Method     | C [%] | H [%] | Date       | Time  |
|-----|------------|-----------|------------|-------|-------|------------|-------|
| 39  | 1.3040     | RM-AK-250 | 2mgChem80s | 24.72 | 5.444 | 04-10-2019 | 19:05 |

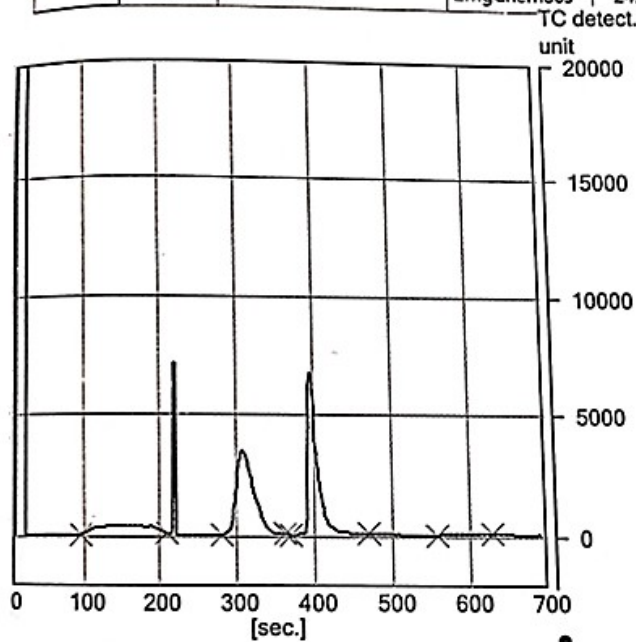

Fig. S29 Elemental analysis of  $[^t\text{BuPO}_3\text{HK}(\text{H}_2\text{O})]_n$  (3).

| No. | Weight [mg] | Name     | Method     | N [%] | C [%] | H [%] | Date       | Time  |
|-----|-------------|----------|------------|-------|-------|-------|------------|-------|
| 21  | 1.3150      | RM-AG-Ca | 2mgChem80s | 0.00  | 25.23 | 5.553 | 04-04-2024 | 15:06 |

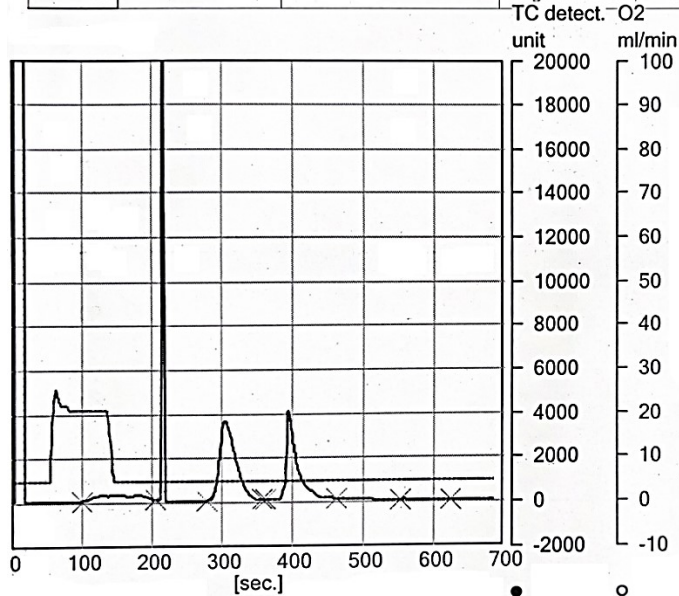

Fig. S30 Elemental analysis of  $[\text{BuPO}_3\text{Ca}(\text{H}_2\text{O})]_n$  (4).

| No. | Weight [mg] | Name     | Method     | N [%] | C [%] | H [%] | Date       | Time  |
|-----|-------------|----------|------------|-------|-------|-------|------------|-------|
| 29  | 1.5850      | RM-AG-Mn | 2mgChem80s | 0.00  | 22.96 | 5.272 | 04-04-2024 | 16:40 |

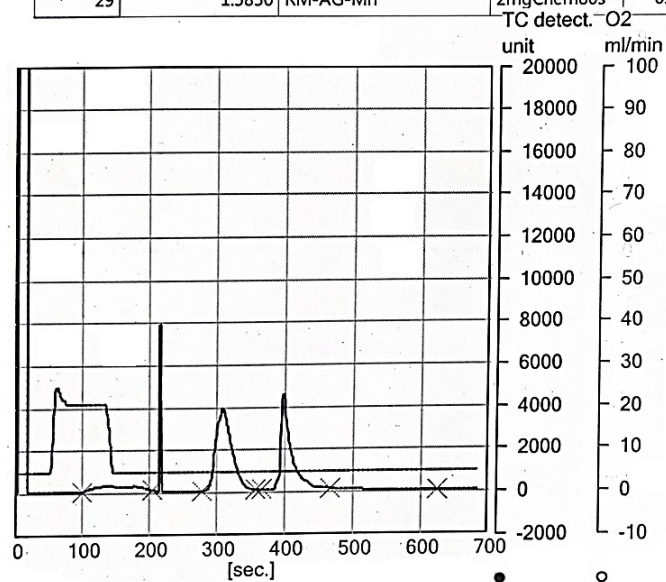

Fig. S31 Elemental analysis of  $[\text{BuPO}_3\text{Mn}(\text{H}_2\text{O})]_n$  (5).

| No. | Weight [mg] | Name   | Method     | N [%] | C [%] | H [%] | Date       | Time  |
|-----|-------------|--------|------------|-------|-------|-------|------------|-------|
| 20  | 0.3390      | RM-316 | 2mgChem80s | 0.00  | 22.66 | 5.296 | 04-04-2024 | 14:54 |

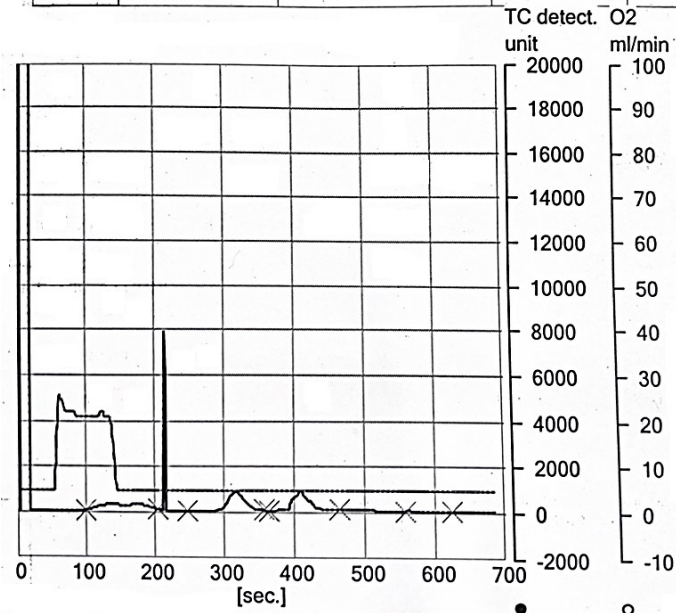

**Fig. S32** Elemental analysis of  $[\text{tBuPO}_3\text{Co}(\text{H}_2\text{O})]_n$  (**6**).

**Table S10.** Chemical composition of **1-3** measured with ICP-AES

| Sample code | Metal (M) | Metal (ppm) | M (%) | P (ppm) | P (%) | n(M)/n(P) |
|-------------|-----------|-------------|-------|---------|-------|-----------|
| <b>1</b>    | Li        | 3.826       | 0.55  | 14.271  | 0.46  | 1.19      |
| <b>2</b>    | Na        | 10.235      | 0.44  | 12.809  | 0.41  | 1.07      |
| <b>3</b>    | K         | 35.806      | 0.91  | 25.281  | 0.81  | 1.12      |

**Table S11.** Chemical composition of **4-6** measured with ICP-AES

| Sample code | Metal (M) | Metal (ppm) | M (%) | P (ppm) | P (%) | n(M)/n(P) |
|-------------|-----------|-------------|-------|---------|-------|-----------|
| <b>4</b>    | Ca        | 18.481      | 0.46  | 11.74   | 0.38  | 1.21      |
| <b>5</b>    | Mn        | 25.764      | 0.46  | 11.176  | 0.36  | 1.27      |
| <b>6</b>    | Co        | 24.694      | 0.41  | 12.549  | 0.41  | 1         |
